# Supplementary material for: The Modified Shields Classification and 12 Families with Defined DSPP Mutations
Source: MDPI journal article supplement (doi:10.3390/genes13050858), 2022-05-12
Supplement: s1 [file s1]

## **The Modified Shields Classification and 12 Families with Defined *DSPP* Mutations**

James P. Simmer<sup>1\*</sup>, Hong Zhang<sup>1</sup>, Sophie J.H. Moon<sup>1</sup>, Lori A-J. Donnelly<sup>2</sup>, Yuan-Ling Lee<sup>3</sup>,  
Figen Seymen<sup>4</sup>, Mine Koruyucu<sup>5</sup>, Hui-Chen Chan<sup>6</sup>, Kevin Y. Lee<sup>6</sup>, Suwei Wu<sup>6</sup>,  
Chia-Lan Hsiang<sup>6</sup>, Anthony T.P. Tsai<sup>6</sup>, Rebecca L. Slayton<sup>7</sup>, Melissa Morrow<sup>8</sup>,  
Shih-Kai Wang<sup>9</sup>, Edward D. Shields<sup>10</sup>, and Jan C.-C. Hu<sup>1</sup>

1. Biologic and Materials Sciences & Prosthodontics, University of Michigan School of Dentistry, 1011 N University Ave. Ann Arbor, Michigan, USA.
2. Department of Oral and Maxillofacial Surgery, Adams School of Dentistry, University of North Carolina at Chapel Hill, 149 Brauer Hall, CB #7450 Chapel Hill, NC 27599.
3. Graduate Institute of Clinical Dentistry, National Taiwan University, No.1, Chang-de St., Zhongzheng Dist., Taipei City 100, Taiwan R.O.C.
4. Department of Pedodontics, Faculty of Dentistry, Altinbas University, Istanbul, Turkey
5. Department of Pedodontics, Faculty of Dentistry, Istanbul University, Istanbul, Turkey.
6. Taipei Municipal WanFang Hospital, Xinglong Rd 111, Taipei, Taiwan.
7. Department of Pediatric Dentistry, University of Washington School of Dentistry. 1959 NE Pacific St., B-307 Seattle, WA 98195-6365.
8. Department of Orthodontic and Pediatric Dentistry, University of Michigan School of Dentistry, 1011 N University Ave. Ann Arbor, Michigan, USA.
9. Department of Dentistry, National Taiwan University School of Dentistry, No. 1, Changde St., Zhongzheng Dist., Taipei City 100, Taiwan.
10. 2161 Pardee Road, Neebing, Ontario, CA P7L0G7

## Supplemental Data File

**Table S1.** Alignment of DPP coding region of *DSPP* showing allelic variants and disease-causing mutations

**Table S1. Alignment of DPP coding region of *DSPP* showing allelic variants and disease-causing mutations.** DPP sequences exhibit novel patterns of insertions and deletions (indels), necessitating the use of this type of alignment to properly compare patient data to the DSPP reference sequencer (“REFSEQ” is the NCBI *DSPP* reference sequence NM\_014208.3). "Fam8a, Fam8b, Fam9a, Fam9b, Fam10a, Fam10b, Fam12a and Fam12b" are DPP sequences determined by SMART sequencing that show the mutated and native alleles of an affected member from Families 8 through 11 in this study. Ten DPP sequences (F1A through F5B) are from the 5 patients with inherited dentin defects previously characterized by SMART sequencing [1] Wild-type DPP haplotypes were downloaded from NCBI PopSets 162077127 and 162077085 [2]. These PopSets contain DPP haplotype sequences from 2 different sizes of cloned DPP polymerase chain reaction products [3] and are labeled “HAP#”. Haplotypes labeled “SHAP#” were characterized in China and published, but were not submitted to GenBank [4]. However, the locations of all indels were clearly described with respect to the reference sequence. The alignments were made manually, trying to minimize the number of genetic events that would have been required to generate the observed allelic differences in DPP sequences. Only a single previously published DPP sequence for each indel pattern was retained in the final alignment. “MERGED” is a hypothetical *DSPP* haplotype that contains the sequences of all indels in the alignment, while “TRANSL” is the translation of the “MERGED” sequence. Notes provide the locations and phenotypes of mutations associated with inherited dentin defects. Blue highlight indicates a mutation that was manifested as type II dentin dysplasia. Green highlight indicates a mutation that was manifested as dentinogenesis imperfecta. Numbering of the mutation positions was based on the *DSPP* gene reference sequence NG\_012151.1, starting with nucleotide 1, the *DSPP* mRNA reference sequence NM\_004771.3, starting from the A of the ATG translation initiation codon, and the protein reference sequence NP\_055023.2, starting with the Met<sup>1</sup> at the beginning of the signal peptide sequence. The nomenclature used for all disease-causing *DSPP* sequence variations were verified using Mutalyzer 2.0.32 at <https://mutalyzer.nl/>

| REFSEQ    | (1387) | GATGATCCCAATAGCAGTGATGAATCTAATGGCAATGATGCTAAATTCAGAAAGTGACAATAACAGCAGTAGCCGAGGAGATGCTTCTTATAA               | CTGATGAATCAAAAGATAATGGCAATGGCAGTGACTCAAAAGGAGCAGAAGATGATGACAGTGATAGCACATCAGACACTAATAATAGT |
|-----------|--------|-------------------------------------------------------------------------------------------------------------|-------------------------------------------------------------------------------------------|
| Fam8a     |        | CATGCAAGGAGATGATCCCAATAGCAGTGATGAATCTAATGGCAATGATGCTAAATTCAGAAAGTGACAATAACAGCAGTAGCCGAGGAGATGCTTCTTATAA     | CTGATGAATCAAAAGATAATGGCAATGGCAGTGACTCAAAAGGAGCAGAAGATGATGACAGTGATAGCACATCAGACACTAATAATAGT |
| Fam8b     |        | CATGCAAGGAGATGATCCCAATAGCAGTGATGAATCTAATGGCAATGATGCTAAATTCAGAAAGTGACAATAACAGCAGTAGCCGAGGAGATGCTTCTTATAA     | CTGATGAATCAAAAGATAATGGCAATGGCAGTGACTCAAAAGGAGCAGAAGATGATGACAGTGATAGCACATCAGACACTAATAATAGT |
| Fam9a     |        | CATGCAAGGAGATGATCCCAATAGCAGTGATGAATCTAATGGCAATGATGCTAAATTCAGAAAGTGACAATAACAGCAGTAGCCGAGGAGATGCTTCTTATAA     | CTGATGAATCAAAAGATAATGGCAATGGCAGTGACTCAAAAGGAGCAGAAGATGATGACAGTGATAGCACATCAGACACTAATAATAGT |
| Fam9b     |        | ATGCAAGGAGATGATCCCAATAGCAGTGATGAATCTAATGGCAATGATGCTAAATTCAGAAAGTGACAATAACAGCAGTAGCCGAGGAGATGCTTCTTATAA      | CTGATGAATCAAAAGATAATGGCAATGGCAGTGACTCAAAAGGAGCAGAAGATGATGACAGTGATAGCACATCAGACACTAATAATAGT |
| Fam10a    |        | CATGCAAGGAGATGATCCCAATAGCAGTGATGAATCTAATGGCAATGATGCTAAATTCAGAAAGTGACAATAACAGCAGTAGCCGAGGAGATGCTTCTTATAA     | CTGATGAATCAAAAGATAATGGCAATGGCAGTGACTCAAAAGGAGCAGAAGATGATGACAGTGATAGCACATCAGACACTAATAATAGT |
| Fam10b    |        | CATGCAAGGAGATGATCCCAATAGCAGTGATGAATCTAATGGCAATGATGCTAAATTCAGAAAGTGACAATAACAGCAGTAGCCGAGGAGATGCTTCTTATAA     | CTGATGAATCAAAAGATAATGGCAATGGCAGTGACTCAAAAGGAGCAGAAGATGATGACAGTGATAGCACATCAGACACTAATAATAGT |
| Fam11a    |        | CATGCAAGGAGATGATCCCAATAGCAGTGATGAATCTAATGGCAATGATGCTAAATTCAGAAAGTGACAATAACAGCAGTAGCCGAGGAGATGCTTCTTATAA     | CTGATGAATCAAAAGATAATGGCAATGGCAGTGACTCAAAAGGAGCAGAAGATGATGACAGTGATAGCACATCAGACACTAATAATAGT |
| Fam11b    |        | CATGCAAGGAGATGATCCCAATAGCAGTGATGAATCTAATGGCAATGATGCTAAATTCAGAAAGTGACAATAACAGCAGTAGCCGAGGAGATGCTTCTTATAA     | CTGATGAATCAAAAGATAATGGCAATGGCAGTGACTCAAAAGGAGCAGAAGATGATGACAGTGATAGCACATCAGACACTAATAATAGT |
| Fam12a    |        | ATGCAAGGAGATGATCCCAATAGCAGTGATGAATCTAATGGCAATGATGCTAAATTCAGAAAGTGACAATAACAGCAGTAGCCGAGGAGATGCTTCTTATAA      | CTGATGAATCAAAAGATAATGGCAATGGCAGTGACTCAAAAGGAGCAGAAGATGATGACAGTGATAGCACATCAGACACTAATAATAGT |
| Fam12b    |        | ATGCAAGGAGATGATCCCAATAGCAGTGATGAATCTAATGGCAATGATGCTAAATTCAGAAAGTGACAATAACAGCAGTAGCCGAGGAGATGCTTCTTATAA      | CTGATGAATCAAAAGATAATGGCAATGGCAGTGACTCAAAAGGAGCAGAAGATGATGACAGTGATAGCACATCAGACACTAATAATAGT |
| F1A       |        | AGTCCATGCAAGGAGATGATCCCAATAGCAGTGATGAATCTAATGGCAATGATGCTAAATTCAGAAAGTGACAATAACAGCAGTAGCCGAGGAGATGCTTCTTATAA | CTGATGAATCAAAAGATAATGGCAATGGCAGTGACTCAAAAGGAGCAGAAGATGATGACAGTGATAGCACATCAGACACTAATAATAGT |
| F1B       |        | AGTCCATGCAAGGAGATGATCCCAATAGCAGTGATGAATCTAATGGCAATGATGCTAAATTCAGAAAGTGACAATAACAGCAGTAGCCGAGGAGATGCTTCTTATAA | CTGATGAATCAAAAGATAATGGCAATGGCAGTGACTCAAAAGGAGCAGAAGATGATGACAGTGATAGCACATCAGACACTAATAATAGT |
| F2A       |        | AGTCCATGCAAGGAGATGATCCCAATAGCAGTGATGAATCTAATGGCAATGATGCTAAATTCAGAAAGTGACAATAACAGCAGTAGCCGAGGAGATGCTTCTTATAA | CTGATGAATCAAAAGATAATGGCAATGGCAGTGACTCAAAAGGAGCAGAAGATGATGACAGTGATAGCACATCAGACACTAATAATAGT |
| F2B       |        | AGTCCATGCAAGGAGATGATCCCAATAGCAGTGATGAATCTAATGGCAATGATGCTAAATTCAGAAAGTGACAATAACAGCAGTAGCCGAGGAGATGCTTCTTATAA | CTGATGAATCAAAAGATAATGGCAATGGCAGTGACTCAAAAGGAGCAGAAGATGATGACAGTGATAGCACATCAGACACTAATAATAGT |
| F3A       |        | AGTCCATGCAAGGAGATGATCCCAATAGCAGTGATGAATCTAATGGCAATGATGCTAAATTCAGAAAGTGACAATAACAGCAGTAGCCGAGGAGATGCTTCTTATAA | CTGATGAATCAAAAGATAATGGCAATGGCAGTGACTCAAAAGGAGCAGAAGATGATGACAGTGATAGCACATCAGACACTAATAATAGT |
| F3B       |        | AGTCCATGCAAGGAGATGATCCCAATAGCAGTGATGAATCTAATGGCAATGATGCTAAATTCAGAAAGTGACAATAACAGCAGTAGCCGAGGAGATGCTTCTTATAA | CTGATGAATCAAAAGATAATGGCAATGGCAGTGACTCAAAAGGAGCAGAAGATGATGACAGTGATAGCACATCAGACACTAATAATAGT |
| F4A       |        | AGTCCATGCAAGGAGATGATCCCAATAGCAGTGATGAATCTAATGGCAATGATGCTAAATTCAGAAAGTGACAATAACAGCAGTAGCCGAGGAGATGCTTCTTATAA | CTGATGAATCAAAAGATAATGGCAATGGCAGTGACTCAAAAGGAGCAGAAGATGATGACAGTGATAGCACATCAGACACTAATAATAGT |
| F4B       |        | AGTCCATGCAAGGAGATGATCCCAATAGCAGTGATGAATCTAATGGCAATGATGCTAAATTCAGAAAGTGACAATAACAGCAGTAGCCGAGGAGATGCTTCTTATAA | CTGATGAATCAAAAGATAATGGCAATGGCAGTGACTCAAAAGGAGCAGAAGATGATGACAGTGATAGCACATCAGACACTAATAATAGT |
| F5A       |        | AGTCCATGCAAGGAGATGATCCCAATAGCAGTGATGAATCTAATGGCAATGATGCTAAATTCAGAAAGTGACAATAACAGCAGTAGCCGAGGAGATGCTTCTTATAA | CTGATGAATCAAAAGATAATGGCAATGGCAGTGACTCAAAAGGAGCAGAAGATGATGACAGTGATAGCACATCAGACACTAATAATAGT |
| F5B       |        | AGTCCATGCAAGGAGATGATCCCAATAGCAGTGATGAATCTAATGGCAATGATGCTAAATTCAGAAAGTGACAATAACAGCAGTAGCCGAGGAGATGCTTCTTATAA | CTGATGAATCAAAAGATAATGGCAATGGCAGTGACTCAAAAGGAGCAGAAGATGATGACAGTGATAGCACATCAGACACTAATAATAGT |
| HAP1A     |        | CAGAGAGATGCTTCTTATAA                                                                                        | CTGATGAATCAAAAGATAATGGCAATGGCAGTGACTCAAAAGGAGCAGAAGATGATGACAGTGATAGCACATCAGACACTAATAATAGT |
| HAP2A     |        | CAGAGAGATGCTTCTTATAA                                                                                        | CTGATGAATCAAAAGATAATGGCAATGGCAGTGACTCAAAAGGAGCAGAAGATGATGACAGTGATAGCACATCAGACACTAATAATAGT |
| HAP3A     |        | CAGAGAGATGCTTCTTATAA                                                                                        | CTGATGAATCAAAAGATAATGGCAATGGCAGTGACTCAAAAGGAGCAGAAGATGATGACAGTGATAGCACATCAGACACTAATAATAGT |
| HAP15A    |        | CAGAGAGATGCTTCTTATAA                                                                                        | CTGATGAATCAAAAGATAATGGCAATGGCAGTGACTCAAAAGGAGCAGAAGATGATGACAGTGATAGCACATCAGACACTAATAATAGT |
| HAP17B    |        | CAGAGAGATGCTTCTTATAA                                                                                        | CTGATGAATCAAAAGATAATGGCAATGGCAGTGACTCAAAAGGAGCAGAAGATGATGACAGTGATAGCACATCAGACACTAATAATAGT |
| HAP20A    |        | CAGAGAGATGCTTCTTATAA                                                                                        | CTGATGAATCAAAAGATAATGGCAATGGCAGTGACTCAAAAGGAGCAGAAGATGATGACAGTGATAGCACATCAGACACTAATAATAGT |
| HAP20B    |        | CAGAGAGATGCTTCTTATAA                                                                                        | CTGATGAATCAAAAGATAATGGCAATGGCAGTGACTCAAAAGGAGCAGAAGATGATGACAGTGATAGCACATCAGACACTAATAATAGT |
| HAP36A    |        | CAGAGAGATGCTTCTTATAA                                                                                        | CTGATGAATCAAAAGATAATGGCAATGGCAGTGACTCAAAAGGAGCAGAAGATGATGACAGTGATAGCACATCAGACACTAATAATAGT |
| HAP37A    |        | CAGAGAGATGCTTCTTATAA                                                                                        | CTGATGAATCAAAAGATAATGGCAATGGCAGTGACTCAAAAGGAGCAGAAGATGATGACAGTGATAGCACATCAGACACTAATAATAGT |
| HAP38A    |        | CAGAGAGATGCTTCTTATAA                                                                                        | CTGATGAATCAAAAGATAATGGCAATGGCAGTGACTCAAAAGGAGCAGAAGATGATGACAGTGATAGCACATCAGACACTAATAATAGT |
| SHAP1:    |        | GATGATCCCAATAGCAGTGATGAATCTAATGGCAATGATGCTAAATTCAGAAAGTGACAATAACAGCAGTAGCCGAGGAGATGCTTCTTATAA               | CTGATGAATCAAAAGATAATGGCAATGGCAGTGACTCAAAAGGAGCAGAAGATGATGACAGTGATAGCACATCAGACACTAATAATAGT |
| SHAP2:    |        | GATGATCCCAATAGCAGTGATGAATCTAATGGCAATGATGCTAAATTCAGAAAGTGACAATAACAGCAGTAGCCGAGGAGATGCTTCTTATAA               | CTGATGAATCAAAAGATAATGGCAATGGCAGTGACTCAAAAGGAGCAGAAGATGATGACAGTGATAGCACATCAGACACTAATAATAGT |
| SHAP3:    |        | GATGATCCCAATAGCAGTGATGAATCTAATGGCAATGATGCTAAATTCAGAAAGTGACAATAACAGCAGTAGCCGAGGAGATGCTTCTTATAA               | CTGATGAATCAAAAGATAATGGCAATGGCAGTGACTCAAAAGGAGCAGAAGATGATGACAGTGATAGCACATCAGACACTAATAATAGT |
| SHAP4:    |        | GATGATCCCAATAGCAGTGATGAATCTAATGGCAATGATGCTAAATTCAGAAAGTGACAATAACAGCAGTAGCCGAGGAGATGCTTCTTATAA               | CTGATGAATCAAAAGATAATGGCAATGGCAGTGACTCAAAAGGAGCAGAAGATGATGACAGTGATAGCACATCAGACACTAATAATAGT |
| SHAP5:    |        | GATGATCCCAATAGCAGTGATGAATCTAATGGCAATGATGCTAAATTCAGAAAGTGACAATAACAGCAGTAGCCGAGGAGATGCTTCTTATAA               | CTGATGAATCAAAAGATAATGGCAATGGCAGTGACTCAAAAGGAGCAGAAGATGATGACAGTGATAGCACATCAGACACTAATAATAGT |
| SHAP6:    |        | GATGATCCCAATAGCAGTGATGAATCTAATGGCAATGATGCTAAATTCAGAAAGTGACAATAACAGCAGTAGCCGAGGAGATGCTTCTTATAA               | CTGATGAATCAAAAGATAATGGCAATGGCAGTGACTCAAAAGGAGCAGAAGATGATGACAGTGATAGCACATCAGACACTAATAATAGT |
| SHAP6 (2) |        | GATGATCCCAATAGCAGTGATGAATCTAATGGCAATGATGCTAAATTCAGAAAGTGACAATAACAGCAGTAGCCGAGGAGATGCTTCTTATAA               | CTGATGAATCAAAAGATAATGGCAATGGCAGTGACTCAAAAGGAGCAGAAGATGATGACAGTGATAGCACATCAGACACTAATAATAGT |
| SHAP7:    |        | GATGATCCCAATAGCAGTGATGAATCTAATGGCAATGATGCTAAATTCAGAAAGTGACAATAACAGCAGTAGCCGAGGAGATGCTTCTTATAA               | CTGATGAATCAAAAGATAATGGCAATGGCAGTGACTCAAAAGGAGCAGAAGATGATGACAGTGATAGCACATCAGACACTAATAATAGT |

[illegible]

1. g.10820delT; c.1686delT; p.(Asp562Glufs\*752) [5]

1. g.10820delT; c.1686delT; p.(Asp562Glufs\*752) [5]

657

2. g.10964delC; c.1830delC; p.(Ser610Argfs\*704) [5]
3. g.11004\_11007delTCAG; c.1870\_1873delTCAG; p.(Ser624Thrfs\*689) [2]
4. g.11008\_11011delACAG; c.1874\_1877delACAG; p.(Asp625Alafs\*688) [6]
5. g.11049\_11052delAAGT; c.1915\_1918delAAGT; p.(Lys639Glnfs\*674) [1,7]
6. g.11052\_11055delTCAG; c.1918\_1921delTCAG; p.(Ser640Thrfs\*673) [1,2,5]
7. g.11056\_11059delACAG; c.1922\_1925delACAG; p.(Asp641Alafs\*672) [5]

718

**ID1:** NM\_014208.3:c.2035\_2040del AGTAGC.  
**ID2:** NM\_014208.3:c.2053\_2054insGTAGCAGTGACAGCAGCA.

8. g.11174delC; **c.2040delC**; p.(Ser680Argfs\*634) [4]  
 9. g.11197delA; **c.2063delA**; p.(Asp688Valfs\*626) [5]  
 10. g.11268delA; **c.2134delA**; p.(Ser712Alafs\*602) [1,8]

[illegible]

### Notes:

**ID3:** NM 014208.3:c.2214 2231delCAACAGCAGTGACAGCAG.

**ID4:** NM\_014208.3:c.2286\_2303delCAACAGCAGTGACAGCAG.

### Mutations:

11. g.11406delA; **c.2272delA**; p.(Ser758Alafs\*556) [2]  
12. g.11483delT; **c.2349delT**; p.(Ser783Argfs\*531) [5]

[illegible]

**ID6:** NM\_014208.3:c.2509\_2526delAACAGCAGTGATAGCAGC.

13. g.11659delG; c.2525delG; p.(Ser842Thrfs\*472); Fam 8&9 [2]

**ID9:** NM 014208.3:c.2737 2745delGACAGCAGT.



14. g.11727delA; c.2593delA; p.(Ser865Valfs\*449)[4]  
15. g.11800delG; c.2666delG; p.(Ser889Thrfs\*425)[5]  
16. g.11818delG; c.2684delG; p.(Ser895Metfs\*419)[4,6]  
17. g.11822delT; c.2688delT; p.(Asp896Glu fs\*418)[9]

**Notes:**  
*SNP:* c.2878A>G (p.Ser960Gly).  
*ID10:* NM\_014208.3:c.2836\_2844delGATAGCAGT.  
*ID11:* NM\_014208.3:c.2877\_2906dup (Same as designation: NM\_014208.3:c.2906\_2907insCAACAGCAGTGACAGCAG).

[illegible]

### Notes:

**SNPs:** c.2967T>C; c.2968G>A (p.Asp990Asn); c.3004A>G (p.Asn1002Asp); c.3069T>C; c.3085A>G (p.Asn1029Asp); c.3086A>G (p.Asn1029Ser); c.3087C>T.

**ID12:** NM\_014208.3:c.2958-2975delTGACAGCAGTGATAGCAG.

**ID14:** NM\_014208.3:c.3069\_3086delTAGCAGTGACAGCAGCAA.

[illegible]

**ID17:** NM\_014208.3:c.3170\_3196dup (Same as designation: NM\_014208.3:c.3196\_3197insGCAGTGACAGCAGTGACAGCAGCGACA).

[illegible]

**ID20:** NM\_014208.3:c.3265\_3266insACAGCAGCAATAGCAGTGACAGCAGTGACAGCAGCGACAGCAGTGATAGCAGTGACAGCAGCGATAGCAGTGACAGCAGTGACAGCAGCAATAGCAGTGACAGCAGTGACAGCAGCGACAGCAGTGATAGCAGTGACAGCAGTGACAGCAGCGACAGCAGTGATAGCAGTGAAAGCAGTGATAGCAGT.

18. g.12269delC; c.3135delC; p.(Ser1045Argfs\*269); Family 10 [1,10]

**ID22:** NM 014208.3:c.3430 3447delAGCAGTGACAGCAGTGAA.

**ID23:** NM\_014208.3:c.3447\_3448insAGCAGCGACAGCAGCGAT.

## Mutations:

20. g.12572delC; c.3438delC; p.(Asp1146Glufs\*168) [4]

[illegible]

### Notes:

***Snp8:*** c.3454G>A; p.D1152N

**ID24:** NM 014208.3:c.3466 3492delAGCAGCGACAGCAGTGACAGCAGCGAT

**ID25:** NM\_014208.3:c.3509-3517delACAGCAGCG.

**ID26:** NM\_014208.3:c.3591-3599delTAGCAGCGA.

**ID27:** NM\_014208.3:c.3594\_3611dupCAGCGACAGCAGCGATAG.

**Mutations:** 21. g.12595delG; c.3461delG; p.(Ser1154Metfs\*160) [This paper, Family 11]

22. g.12614 12615insCTGCT; c.3480 3481insCTGCT; p.(Asp1161Leufs\*155) [8]

23. g.12638\_12642dupCAGCG; c.3504\_3508dupCAGCG; p.(Asp1170Alafs\*146) [1]  
 24. g.12643\_12655del13; c.3509\_3521delACAGCAGCGATAG; p.(Asp1170Alafs\*140)[6]  
 25. g.12680\_12684delinsG; c.3546\_3550delTAGCAinsG; p.(Asp1182Glufs\*131)[4]  
 26. g.12694delG; c.3560delG; p.(Ser1187Metfs\*127) [9]  
 27. g.12716\_12725del; c.3582\_3591delCAGCAGCGAT; p.(Asp1194Glufs\*117)[5]

**Notes:**

**Mutations:**

28. g.12810delA; c.3676delA; p.(Ser1226Alafs\*88) [11]  
29. g.12759\_12834del76; c.3625-3700del76; p.(Asp1209Alafs\*80) [5]  
30. g.12834delA; c.3700delA; p.(Ser1234Alafs\*80); [This paper, Family 12]

[illegible]

**Mutations:** No disease-causing frameshifts have been observed in this region.

## References

1. Yang, J.; Kawasaki, K.; Lee, M.; Reid, B.M.; Nunez, S.M.; Choi, M.; Seymen, F.; Koruyucu, M.; Kasimoglu, Y.; Estrella-Yuson, N.; et al. The dentin phosphoprotein repeat region and inherited defects of dentin. *Mol Genet Genomic Med* **2016**, *4*, 28-38.
2. McKnight, D.A.; Suzanne Hart, P.; Hart, T.C.; Hartsfield, J.K.; Wilson, A.; Wright, J.T.; Fisher, L.W. A comprehensive analysis of normal variation and disease-causing mutations in the human DSPP gene. *Hum Mutat* **2008**, *29*, 1392-1404.
3. McKnight, D.A.; Simmer, J.P.; Hart, P.S.; Hart, T.C.; Fisher, L.W. Overlapping DSPP mutations cause dentin dysplasia and dentinogenesis imperfecta. *J Dent Res*. **2008**, *87*, 1108-1111.
4. Song, Y.L.; Wang, C.N.; Fan, M.W.; Su, B.; Bian, Z. Dentin phosphoprotein frameshift mutations in hereditary dentin disorders and their variation patterns in normal human population. *J Med Genet* **2008**, *45*, 457-464.
5. Nieminen, P.; Papagiannoulis-Lascarides, L.; Waltimo-Siren, J.; Ollila, P.; Karjalainen, S.; Arte, S.; Veerkamp, J.; Tallon Walton, V.; Chimenos Küstner, E.; Siltanen, T.; et al. Frameshift mutations in dentin phosphoprotein and dependence of dentin disease phenotype on mutation location. *J Bone Miner Res* **2011**, *26*, 873-880.
6. Li, F.; Liu, Y.; Liu, H.; Yang, J.; Zhang, F.; Feng, H. Phenotype and genotype analyses in seven families with dentinogenesis imperfecta or dentin dysplasia. *Oral Dis*. **2017**, *23*, 360-366.
7. Porntaveetus, T.; Osathanon, T.; Nowwarote, N.; Pavasant, P.; Srichomthong, C.; Suphapeetiporn, K.; Shotelersuk, V. Dental Properties, Ultrastructure, and Pulp Cells Associated With a Novel DSPP Mutation. *Oral Dis* **2018**, *24*, 619-627.
8. Lee, J.W.; Hong, J.; Seymen, F.; Kim, Y.J.; Kang, J.; Koruyucu, M.; Tuloglu, N.; Bayrak, S.; Song, J.S.; Shin, T.J.; et al. Novel frameshift mutations in DSPP cause dentin dysplasia type II. *Oral Dis* **2019**, *27*, 13182.
9. Lee, K.; Kang, H.; Lee, S.; Yoo, S.; Lee, J.; Hwang, Y.; Nam, K.; Kim, J.; Park, J.; Kim, J.-W. Novel dentin phosphoprotein frameshift mutations in dentinogenesis imperfecta type II. *Clin Genet* **2011**, *79*, 378-384.
10. McKnight, D.A.; Simmer, J.P.; Hart, P.S.; Hart, T.C.; Fisher, L.W. Overlapping DSPP mutations cause dentin dysplasia and dentinogenesis imperfecta. *J Dent Res* **2008**, *87*, 1108-1111.



11. Bloch-Zupan, A.; Huckert, M.; Stoetzel, C.; Meyer, J.; Geoffroy, V.; Razafindrakoto, R.W.; Ralison, S.N.; Randrianaivo, J.C.; Ralison, G.; Andriamasinoro, R.O.; et al. Detection of a Novel DSPP Mutation by NGS in a Population Isolate in Madagascar. *Front Physiol.* **2016**, *7*.
